# Supplementary material for: Multiple major increases and decreases in mitochondrial substitution rates in the plant family Geraniaceae
Source: PubMed Central journal article supplement (PMC1343592; doi:10.1186/1471-2148-5-73), 2005-12-20
Supplement: 1471-2148-5-73-S1.pdf [file 1471-2148-5-73-S1.pdf]

**Additional file 1. *cox1* absolute substitution rates**

| Branch    | Time<br>(Myr) | $d_S$<br>(sub./site x 100) | $R_S$<br>(SSB) | $d_N$<br>(sub./site x 100) | $R_N$<br>(SSB) | $R_N / R_S$ |
|-----------|---------------|----------------------------|----------------|----------------------------|----------------|-------------|
| A to B    | 6 ± 2         | 0.00 ± 0.01                | 0              | 0.00 ± 0.00                | 0              | –           |
| B to C    | 33 ± 4        | 0.44 ± 0.13                | 0.14 ± 0.04    | 0.98 ± 0.30                | 0.30 ± 0.10    | 2.23        |
| C to Malp | 72 ± 4        | 4.54 ± 1.15                | 0.63 ± 0.16    | 0.10 ± 0.02                | 0.01 ± 0.00    | 0.02        |
| C to Popu | 72 ± 4        | 4.01 ± 0.77                | 0.56 ± 0.11    | 1.39 ± 0.27                | 0.19 ± 0.04    | 0.35        |
| B to D    | 7 ± 3         | 0.00 ± 0.00                | 0              | 0.20 ± 0.14                | 0.29 ± 0.23    | –           |
| D to E    | 3 ± 4         | 0.00 ± 0.01                | 0              | 0.00 ± 0.00                | 0              | –           |
| E to Betu | 94 ± 3        | 1.62 ± 0.49                | 0.17 ± 0.05    | 0.49 ± 0.15                | 0.05 ± 0.02    | 0.30        |
| E to Rham | 94 ± 3        | 2.29 ± 0.69                | 0.24 ± 0.07    | 0.31 ± 0.09                | 0.03 ± 0.01    | 0.14        |
| D to F    | 6 ± 4         | 0.00 ± 0.00                | 0              | 0.09 ± 0.10                | 0.14 ± 0.18    | –           |
| F to Cucu | 91 ± 3        | 6.22 ± 1.15                | 0.69 ± 0.13    | 0.93 ± 0.17                | 0.10 ± 0.02    | 0.15        |
| F to G    | 39 ± 4        | 2.39 ± 0.57                | 0.61 ± 0.16    | 0.91 ± 0.22                | 0.23 ± 0.06    | 0.38        |
| G to Glyc | 51 ± 3        | 1.35 ± 0.52                | 0.26 ± 0.10    | 0.19 ± 0.07                | 0.04 ± 0.01    | 0.14        |
| G to Pisu | 51 ± 3        | 1.64 ± 0.55                | 0.32 ± 0.11    | 0.29 ± 0.10                | 0.06 ± 0.02    | 0.18        |
| A to H    | 4 ± 2         | 0.00 ± 0.01                | 0              | 0.00 ± 0.00                | 0              | –           |
| H to I    | 2 ± 3         | 0.00 ± 0.01                | 0              | 0.00 ± 0.00                | 0              | –           |
| I to Oeno | 104 ± 2       | 3.59 ± 0.66                | 0.35 ± 0.06    | 1.67 ± 0.31                | 0.16 ± 0.03    | 0.47        |
| I to J    | 9 ± 4         | 0.00 ± 0.00                | 0              | 0.09 ± 0.10                | 0.10 ± 0.12    | –           |
| J to Burs | 95 ± 4        | 3.18 ± 0.93                | 0.34 ± 0.10    | 0.10 ± 0.03                | 0.01 ± 0.00    | 0.03        |
| J to K    | 76 ± 4        | 5.56 ± 0.90                | 0.73 ± 0.12    | 1.89 ± 0.31                | 0.25 ± 0.04    | 0.34        |
| K to Arab | 19 ± 2        | 0.28 ± 0.29                | 0.15 ± 0.15    | 0.00 ± 0.00                | 0              | 0.00        |
| K to Bras | 19 ± 2        | 1.39 ± 0.58                | 0.74 ± 0.31    | 0.10 ± 0.04                | 0.05 ± 0.02    | 0.07        |
| H to L    | 8 ± 4         | 0.23 ± 0.27                | 0.31 ± 0.40    | 0.00 ± 0.00                | 0              | 0.00        |
| L to Cros | 99 ± 3        | 1.95 ± 0.45                | 0.20 ± 0.05    | 1.18 ± 0.27                | 0.12 ± 0.03    | 0.61        |
| L to M    | 36 ± 6        | 8.75 ± 1.29                | 2.43 ± 0.53    | 2.05 ± 0.30                | 0.57 ± 0.12    | 0.23        |
| M to Hyps | 62 ± 5        | 6.86 ± 1.28                | 1.10 ± 0.22    | 0.95 ± 0.18                | 0.15 ± 0.03    | 0.14        |
| M to N    | 16 ± 6        | 6.74 ± 1.90                | 4.09 ± 1.87    | 0.35 ± 0.10                | 0.21 ± 0.10    | 0.05        |
| N to O    | 11 ± 5        | 1.06 ± 1.32                | 0.96 ± 1.27    | 0.10 ± 0.12                | 0.09 ± 0.12    | 0.09        |
| O to P    | 26 ± 4        | 1.09 ± 0.55                | 0.42 ± 0.22    | 0.00 ± 0.00                | 0              | 0.00        |
| P to Mons | 9 ± 2         | 0.81 ± 0.33                | 0.91 ± 0.46    | 0.29 ± 0.12                | 0.33 ± 0.16    | 0.36        |
| P to Sarc | 9 ± 2         | 0.54 ± 0.27                | 0.61 ± 0.35    | 0.19 ± 0.10                | 0.21 ± 0.13    | 0.35        |
| O to Q    | 6 ± 4         | 0.00 ± 0.01                | 0              | 0.00 ± 0.00                | 0              | –           |
| Q to R    | 11 ± 4        | 0.00 ± 0.01                | 0              | 0.00 ± 0.00                | 0              | –           |
| R to Ggra | 18 ± 3        | 1.08 ± 0.44                | 0.59 ± 0.26    | 0.19 ± 0.08                | 0.10 ± 0.05    | 0.18        |
| R to Gmac | 18 ± 3        | 0.81 ± 0.31                | 0.44 ± 0.18    | 0.39 ± 0.15                | 0.21 ± 0.09    | 0.48        |
| Q to S    | 5 ± 4         | 0.81 ± 0.47                | 1.63 ± 1.59    | 0.00 ± 0.00                | 0              | 0.00        |
| S to Etri | 24 ± 3        | 0.27 ± 0.16                | 0.11 ± 0.07    | 0.19 ± 0.11                | 0.08 ± 0.05    | 0.70        |
| S to T    | 18 ± 3        | 0.27 ± 0.27                | 0.15 ± 0.16    | 0.00 ± 0.00                | 0              | 0.00        |
| T to Echr | 7 ± 1         | 0.00 ± 0.00                | 0              | 0.10 ± 0.10                | 0.15 ± 0.15    | –           |
| T to Epel | 7 ± 1         | 0.00 ± 0.02                | 0              | 0.00 ± 0.00                | 0              | –           |
| N to U    | 23 ± 5        | 68.89 ± 7.53               | 30.25 ± 7.54   | 1.57 ± 0.17                | 0.69 ± 0.17    | 0.02        |
| U to V    | 10 ± 4        | 7.28 ± 3.47                | 7.17 ± 4.55    | 0.65 ± 0.31                | 0.64 ± 0.41    | 0.09        |
| V to Pcap | 13 ± 2        | 1.38 ± 0.54                | 1.06 ± 0.46    | 0.29 ± 0.11                | 0.22 ± 0.10    | 0.21        |
| V to W    | 8 ± 3         | 0.78 ± 0.48                | 0.96 ± 0.69    | 0.10 ± 0.06                | 0.12 ± 0.09    | 0.13        |
| W to Pcot | 5 ± 2         | 0.00 ± 0.00                | 0              | 0.49 ± 0.22                | 0.98 ± 0.54    | –           |
| W to Pren | 5 ± 2         | 1.86 ± 0.59                | 3.74 ± 1.69    | 0.29 ± 0.09                | 0.58 ± 0.27    | 0.16        |
| U to X    | 8 ± 5         | 31.33 ± 5.10               | 37.68 ± 23.17  | 0.92 ± 0.15                | 1.11 ± 0.68    | 0.03        |
| X to Pcan | 15 ± 3        | 16.96 ± 2.65               | 11.38 ± 3.15   | 0.98 ± 0.15                | 0.66 ± 0.18    | 0.06        |
| X to Y    | 5 ± 4         | 6.73 ± 2.11                | 13.41 ± 12.61  | 0.22 ± 0.07                | 0.44 ± 0.41    | 0.03        |
| Y to Pque | 10 ± 3        | 4.72 ± 1.25                | 4.77 ± 1.87    | 0.21 ± 0.06                | 0.21 ± 0.08    | 0.04        |
| Y to Z    | 8 ± 3         | 5.70 ± 1.39                | 7.25 ± 3.39    | 0.00 ± 0.00                | 0              | 0.00        |
| Z to Palc | 2 ± 1         | 0.24 ± 0.11                | 1.18 ± 0.95    | 0.38 ± 0.18                | 1.88 ± 1.49    | 1.58        |
| Z to Phor | 2 ± 1         | 1.03 ± 0.39                | 5.08 ± 3.78    | 0.33 ± 0.13                | 1.63 ± 1.21    | 0.32        |
