# Supplementary material for: Multiple major increases and decreases in mitochondrial substitution rates in the plant family Geraniaceae
Source: PubMed Central journal article supplement (PMC1343592; doi:10.1186/1471-2148-5-73), 2005-12-20
Supplement: 1471-2148-5-73-S2.pdf [file 1471-2148-5-73-S2.pdf]

**Additional file 2a. List of mitochondrial sequences used for figure 1**

**GenBank Accession Numbers**

| <b>Genus</b>              | <b><i>atp1</i></b> | <b><i>cob</i></b> | <b><i>cox2</i></b> | <b><i>cox3</i></b> | <b>mt LSU</b> | <b><i>nad1</i></b> |
|---------------------------|--------------------|-------------------|--------------------|--------------------|---------------|--------------------|
| <i>Mahonia</i>            | –                  | AY832081          | –                  | AY832113           | –             | –                  |
| <i>Ranunculus</i>         | AF197714           | –                 | –                  | –                  | –             | AY674761           |
| <i>Platanus</i>           | AY009423           | AY832084          | –                  | AY832117           | –             | AY832123           |
| <i>Beta</i>               | BA000009           | BA000009          | BA000009           | BA000009           | BA000009      | BA000009           |
| <i>Daucus</i>             | –                  | –                 | X63625             | –                  | –             | –                  |
| <i>Sambucus</i>           | AY741813           | DQ317064          | –                  | DQ317066           | –             | –                  |
| <i>Nicotiana</i>          | BA000042           | BA000042          | BA000042           | BA000042           | BA000042      | BA000042           |
| <i>Chaerophyllum</i>      | –                  | –                 | –                  | –                  | –             | AY283607           |
| <i>Pl. media</i>          | AY818938           | –                 | –                  | –                  | –             | –                  |
| <i>Pl. rugelii</i>        | AY818939           | AY818946          | AY818947           | –                  | AY818948      | –                  |
| <i>Oenothera</i>          | X04023             | X07126            | X00212             | X04764             | X02559        | M63033             |
| <i>Glycine</i>            | Z14031             | –                 | X04825             | X15131             | –             | AJ428875           |
| <i>Lupinus</i>            | –                  | –                 | –                  | –                  | –             | –                  |
| <i>Pisum</i>              | D14698             | AJ132231          | AJ414385           | –                  | –             | –                  |
| <i>Vicia</i>              | –                  | X07237            | –                  | X51690             | –             | –                  |
| <i>Arabidopsis</i>        | Y08502             | Y08501            | Y08501             | Y08502             | Y08501        | Y08502             |
| <i>Brassica</i>           | AP006444           | AP006444          | AP006444           | AP006444           | AP006444      | AP006444           |
| <i>Hypseocharis</i>       | DQ317060           | –                 | –                  | –                  | –             | –                  |
| <i>Geranium</i>           | –                  | –                 | –                  | –                  | –             | AF167132           |
| <i>Sarcocaulon</i>        | DQ317062           | –                 | –                  | –                  | –             | AF167133           |
| <i>E. pelargoniflorum</i> | DQ317061           | –                 | –                  | –                  | –             | –                  |
| <i>Pe. hortorum</i>       | DQ317063           | DQ317065          | DQ317069           | DQ317067           | DQ317059      | –                  |
| <i>Pe. tongaense</i>      | –                  | –                 | –                  | –                  | –             | AF167104           |
| <i>Pe. cotyledonis</i>    | –                  | –                 | –                  | –                  | –             | AF256578           |
| <i>Pe. reniforme</i>      | –                  | –                 | –                  | DQ317068           | –             | –                  |

GenBank accession numbers for *cox1* and mt SSU are listed in additional file 2d.

**Additional file 2b. List of chloroplast sequences used for figure 1**

**GenBank Accession Numbers**

---

| <b>Genus</b>        | <b><i>matK</i></b> | <b><i>ndhF</i></b> | <b><i>petD</i></b> | <b><i>rps11</i></b> |
|---------------------|--------------------|--------------------|--------------------|---------------------|
| <i>Clematis</i>     | –                  | AY145147           | –                  | –                   |
| <i>Ranunculus</i>   | DQ069586           | –                  | DQ069568           | DQ069538            |
| <i>Platanus</i>     | AF543747           | AY394743           | –                  | –                   |
| <i>Spinacia</i>     | AJ400848           | AJ400848           | AJ400848           | AJ400848            |
| <i>Panax</i>        | AY582139           | AY582139           | AY582139           | AY582139            |
| <i>Nicotiana</i>    | Z00044             | Z00044             | Z00044             | Z00044              |
| <i>Pl. rugelii</i>  | DQ317070           | AY818915           | –                  | –                   |
| <i>Oenothera</i>    | AJ271079           | AJ271079           | AJ271079           | AJ271079            |
| <i>Lotus</i>        | AP002983           | AP002983           | AP002983           | AP002983            |
| <i>Pisum</i>        | AY386961           | –                  | AF153442           | –                   |
| <i>Vicia</i>        | –                  | X14804             | –                  | –                   |
| <i>Vigna</i>        | –                  | –                  | –                  | AF536226            |
| <i>Arabidopsis</i>  | AP000423           | AP000423           | AP000423           | AP000423            |
| <i>Brassica</i>     | AY541618           | AF064647           | –                  | –                   |
| <i>Pe. hortorum</i> | DQ317071           | DQ317072           | DQ317073           | DQ317074            |

---

GenBank accession numbers for *rbcL* are listed in additional file 2d.

**Additional file 2c. List of nuclear sequences used for figure 1**

**GenBank Accession Numbers**

| <b>Genus</b>         | <b><i>aco</i></b> | <b><i>acs</i></b> | <b><i>etr</i></b> |
|----------------------|-------------------|-------------------|-------------------|
| <i>Delphinium</i>    | –                 | –                 | AB201245          |
| <i>Dianthus</i>      | L35152            | –                 | AB035806          |
| <i>Rumex</i>         | Y10034            | AF038945          | –                 |
| <i>Helianthus1</i>   | U62553            | –                 | –                 |
| <i>Helianthus2</i>   | U62554            | –                 | –                 |
| <i>Lactuca1</i>      | –                 | AF380836          | AF350321          |
| <i>Lactuca2</i>      | –                 | AF380837          | –                 |
| <i>Nicotiana1</i>    | AB012857          | AJ005002          | AF022727          |
| <i>Nicotiana2</i>    | X83229            | X65982            | –                 |
| <i>Antirrhinum</i>   | –                 | AF083814          | AY159362          |
| <i>Pl. major</i>     | AJ843131          | –                 | –                 |
| <i>Striga</i>        | –                 | AB072042          | –                 |
| <i>Glycine</i>       | –                 | X67100            | –                 |
| <i>Lupinus</i>       | –                 | AF119411          | –                 |
| <i>Pisum</i>         | –                 | AB049725          | –                 |
| <i>Trifolium1</i>    | AF115262          | –                 | –                 |
| <i>Trifolium2</i>    | AF115261          | –                 | –                 |
| <i>Vigna1</i>        | AB002667          | Z11613            | –                 |
| <i>Vigna2</i>        | AF315316          | –                 | –                 |
| <i>Fagus</i>         | –                 | –                 | AJ420193          |
| <i>Prunus</i>        | –                 | –                 | AF124527          |
| <i>Mangifera1</i>    | AJ297435          | AF170705          | AF227742          |
| <i>Mangifera2</i>    | AJ505610          | U22523            | –                 |
| <i>Arabidopsis1</i>  | NM_100380         | NM_116016         | NM_105305         |
| <i>Arabidopsis2</i>  | NM_101073         | –                 | –                 |
| <i>Brassica1</i>     | AF252853          | X82273            | AF047476          |
| <i>Brassica2</i>     | X81629            | –                 | –                 |
| <i>Carica1</i>       | –                 | U68216            | –                 |
| <i>Carica2</i>       | –                 | AF178077          | –                 |
| <i>Pe. hortorum1</i> | U07953            | U88971            | AF141928          |
| <i>Pe. hortorum2</i> | U19856            | U17229            | –                 |

Additional file 2d. List of sequences used for figures 2-4

GenBank Accession Numbers

| Genus                   | <i>cox1</i> | mt SSU   | <i>atpB</i> | <i>matK</i> | <i>rbcL</i>   | nc SSU      |
|-------------------------|-------------|----------|-------------|-------------|---------------|-------------|
| <i>Euptelea</i>         | AF193963    | AF193997 | –           | –           | AY048174      | L75831      |
| <i>Ranunculus</i>       | DQ317030    | AF161093 | –           | –           | L08766        | L24092      |
| <i>Grevillea</i>        | AF193961    | AF193995 | –           | –           | AF197589      | AF197577    |
| <i>Platanus</i>         | DQ317031    | AF161090 | –           | –           | unpublished   | U42794      |
| <i>Tetracentron</i>     | AF193964    | AF193998 | –           | –           | L12668        | U42814      |
| <i>Trochodendron</i>    | AF020581    | AF161092 | –           | –           | L01958        | U42816      |
| <i>Buxus</i>            | AF193962    | AF193996 | –           | –           | AF093717      | L54065      |
| <i>Beta</i>             | BA000009    | AF161094 | DQ067451    | AY514832    | AY270065      | AF161096    |
| <i>Plumbago</i>         | DQ317032    | –        | –           | –           | M77701        | U42795      |
| <i>Spinacia</i>         | DQ317033    | –        | –           | –           | V00168        | L24420      |
| <i>Diospyros</i>        | AJ223417    | –        | AF213768    | AY145446    | L12613        | L49279      |
| <i>Symplocos</i>        | AJ223435    | –        | –           | –           | L12624        | U43297      |
| <i>Ilex</i>             | AJ223429    | –        | –           | –           | AY725859      | AF206938    |
| <i>Sambucus</i>         | AF193965    | AF194000 | –           | –           | AJ420867      | AF193941    |
| <i>Nerium</i>           | AJ223421    | –        | –           | –           | AJ002886      | AF107572    |
| <i>Nicotiana</i>        | unpublished | AF161095 | X61319      | Z00044      | unpublished   | AJ236016    |
| <i>Solanum</i>          | X83206      | AJ252732 | –           | –           | M76402        | X67238      |
| <i>Jasminum</i>         | AJ247607    | –        | –           | –           | L01929        | AJ236035    |
| <i>Lamium</i>           | AJ223428    | –        | –           | –           | Z37399        | L49287      |
| <i>Sesamum</i>          | AJ247598    | –        | AJ236176    | AJ429340    | L14408        | AJ236041    |
| <i>Epifagus</i>         | –           | U82642   | –           | –           | –             | –           |
| <i>Digitalis</i>        | AJ223415    | AF193999 | –           | –           | X83720        | AF193940    |
| <i>Veronica</i>         | AJ223427    | AY818950 | –           | –           | AJ247611      | AF207052    |
| <i>Pl. atrata</i>       | AJ389610    | AJ389618 | –           | –           | AJ389601      | –           |
| <i>Pl. lanceolata</i>   | AJ389611    | AJ389619 | –           | –           | L36454        | AJ236046    |
| <i>Pl. sempervirens</i> | AJ389612    | AJ389620 | –           | –           | AJ389602      | –           |
| <i>Pl. sericea</i>      | AJ389613    | AJ389621 | –           | –           | AJ389603      | –           |
| <i>Pl. coronopus</i>    | AJ389609    | AJ389617 | –           | –           | AJ389600      | –           |
| <i>Pl. media</i>        | AJ389605    | AJ389614 | –           | –           | AJ389596      | –           |
| <i>Pl. australis</i>    | AJ389608    | AY818949 | –           | –           | AJ389599      | –           |
| <i>Pl. rigida</i>       | AJ389607    | AJ389616 | –           | –           | AJ389598      | –           |
| <i>Pl. rugelii</i>      | AJ389606    | AJ389615 | –           | –           | AJ389597      | AY818951    |
| <i>Oenothera</i>        | X05465      | X61277   | AJ271079    | AJ271079    | Werman et al. | U67930      |
| <i>Malpighia</i>        | AJ223433    | –        | AJ235527    | AF344561    | AJ247619      | L24046      |
| <i>Populus</i>          | U77623      | –        | AF209658    | AJ506088    | AF206812      | AF206999    |
| <i>Maytenus</i>         | –           | AY855839 | –           | –           | –             | –           |
| <i>Cucumis</i>          | AJ223416    | AY258278 | AJ970307    | AJ970307    | AF206755      | AF206894    |
| <i>Glycine</i>          | M16884      | M16859   | –           | AF142700    | Z95552        | X02623      |
| <i>Pisum</i>            | X14409      | –        | X03852      | AY386961    | X03853        | U43011      |
| <i>Lupinus</i>          | –           | Z11512   | –           | –           | –             | –           |
| <i>Betula</i>           | U77620      | –        | AJ235411    | AY372022    | X56617        | L00971      |
| <i>Rhamnus</i>          | AJ223422    | –        | AJ235579    | AY257533    | L13189        | AJ235979    |
| <i>Arabidopsis</i>      | Y08501      | Y08501   | AP000423    | AP000423    | unpublished   | X16077      |
| <i>Brassica</i>         | AP006444    | AP006444 | AF267641    | AY54161     | M88342        | –           |
| <i>Raphanus</i>         | –           | –        | –           | –           | –             | unpublished |
| <i>Bursera</i>          | AJ223412    | –        | AF035899    | –           | L01890        | AF206877    |
| <i>Cytinus</i>          | –           | U82639   | –           | –           | –             | –           |

|                           |          |          |          |          |          |          |
|---------------------------|----------|----------|----------|----------|----------|----------|
| <i>Crossosoma</i>         | DQ317034 | AF194001 | AF209571 | –        | L11179   | AF193942 |
| <i>Hypseocharis</i>       | AF193967 | AF194002 | –        | –        | DQ317048 | DQ317014 |
| <i>G. grandiflorum</i>    | AF193968 | AF194003 | –        | –        | L01920   | AF193943 |
| <i>G. macrorrhizum</i>    | DQ317035 | DQ317028 | –        | –        | DQ317049 | DQ317015 |
| <i>Monsonia</i>           | DQ317036 | DQ317029 | AF209632 | –        | L14701   | DQ317016 |
| <i>Sarcocaulon</i>        | DQ317037 | DQ317004 | –        | –        | L14705   | DQ317017 |
| <i>E. chrysanthum</i>     | DQ317038 | DQ317005 | –        | –        | DQ317050 | DQ317018 |
| <i>E. pelargoniflorum</i> | DQ317039 | DQ317006 | –        | –        | DQ317051 | DQ317019 |
| <i>E. trifolium</i>       | DQ317040 | DQ317007 | –        | –        | DQ317052 | DQ317020 |
| <i>Pe. cotyledonis</i>    | DQ317041 | DQ317008 | AF035911 | –        | DQ317053 | DQ317021 |
| <i>Pe. reniforme</i>      | DQ317042 | DQ317009 | –        | –        | DQ317054 | DQ317022 |
| <i>Pe. capitatum</i>      | DQ317043 | DQ317010 | –        | –        | L14702   | DQ317023 |
| <i>Pe. candicans</i>      | DQ317044 | DQ317011 | –        | –        | DQ317055 | DQ317024 |
| <i>Pe. quercetorum</i>    | DQ317045 | –        | –        | –        | DQ317056 | DQ317025 |
| <i>Pe. alchemilloides</i> | DQ317046 | DQ317012 | –        | –        | DQ317057 | DQ317026 |
| <i>Pe. hortorum</i>       | DQ317047 | DQ317013 | –        | DQ317071 | DQ317058 | DQ317027 |

---
